# Supplementary material for: Educational inequalities in premature mortality by region in the Belgian population in the 2000s
Source: PubMed Central journal article supplement (PMC5641991; doi:10.1186/s13690-017-0212-x), 2017-10-16
Supplement: 13690_2017_212_MOESM1_ESM.pdf [file 13690_2017_212_MOESM1_ESM.pdf]

*Educational inequalities in premature mortality by region in the Belgian population in the 2000s*

*ONLINE APPENDIX*

**Table of Contents**

|                                                                                                                                                                                                        |   |
|--------------------------------------------------------------------------------------------------------------------------------------------------------------------------------------------------------|---|
| Appendix Table 1a. Age-adjusted all-cause premature mortality rates (ASMR) in males by educational level, region and origin, Belgium 2000s; people aged 25-64 at census, 10 years follow up. ....      | 2 |
| Appendix Table 1b. Age-adjusted premature mortality rates (ASMR) in females by educational level, region and origin, Belgium 2000s; people aged 25-64 at census, 10 years follow up. ....              | 3 |
| Appendix Table 2 Codes of deaths selected for the analysis, in ICD9 and ICD10. ....                                                                                                                    | 4 |
| Appendix Table 3a. Age-adjusted cause-specific premature mortality rate (ASMR), by region and educational level in Males, Belgium 2000s; Belgian men aged 25-64 at census, 10 years follow up. ....    | 5 |
| Appendix Table3b. Age-adjusted cause-specific premature mortality rate (ASMR), by region and educational level in females, Belgium 2000s; Belgian women aged 25-64 at census, 10 years follow up. .... | 6 |

**Appendix Table 1a. Age-adjusted all-cause premature mortality rates (ASMR) in males by educational level, region and origin, Belgium 2000s; people aged 25-64 at census, 10 years follow up.**

|                      |                | <i>ASMR BELGIUM</i> | <i>ASMR Fla</i> | <i>ASMR Bxl</i> | <i>ASMR Wal</i> |
|----------------------|----------------|---------------------|-----------------|-----------------|-----------------|
| <i>All Residents</i> | <i>ALL EL</i>  | <b>506.5</b>        | 432.0           | 565.1           | 635.5           |
|                      | <i>Low EL</i>  | <b>593.4</b>        | 513.1           | 661.3           | 729.3           |
|                      | <i>Mid EL</i>  | <b>445.3</b>        | 385.0           | 534.3           | 559.9           |
|                      | <i>High EL</i> | <b>312.1</b>        | 271.3           | 351.2           | 379.0           |
|                      | <i>Missing</i> | <b>892.3</b>        | 783.0           | 817.4           | 1071.9          |
| <i>Belgian</i>       | <i>ALL EL</i>  | <b>514.2</b>        | 433.6           | 659.4           | 665.7           |
|                      | <i>Low EL</i>  | <b>614.7</b>        | 522.4           | 843.9           | 783.0           |
|                      | <i>Mid EL</i>  | <b>450.1</b>        | 386.5           | 600.8           | 582.0           |
|                      | <i>High EL</i> | <b>313.9</b>        | 270.4           | 379.7           | 388.3           |
|                      | <i>Missing</i> | <b>1003.6</b>       | 827.8           | 1223.4          | 1201.0          |
| <i>Migrants</i>      | <i>ALL EL</i>  | <b>463.1</b>        | 417.1           | 433.3           | 514.8           |
|                      | <i>Low EL</i>  | <b>501.4</b>        | 451.4           | 470.9           | 550.8           |
|                      | <i>Mid EL</i>  | <b>412.7</b>        | 367.0           | 403.7           | 458.0           |
|                      | <i>High EL</i> | <b>297.0</b>        | 284.6           | 286.7           | 315.7           |
|                      | <i>Missing</i> | <b>632.9</b>        | 600.3           | 542.6           | 746.1           |

Note: Rates are expressed per 100,000 person-years and age standardized using the European population. Migrants are people from foreign origin officially registered as residents in Belgium.

**Appendix Table 1b. Age-adjusted premature mortality rates (ASMR) in females by educational level, region and origin, Belgium 2000s; people aged 25-64 at census, 10 years follow up.**

|                      |                | <i>ASMR BELGIUM</i> | <i>ASMR Fla</i> | <i>ASMR Bxl</i> | <i>ASMR Wal</i> |
|----------------------|----------------|---------------------|-----------------|-----------------|-----------------|
| <i>All Residents</i> | <i>ALL EL</i>  | <b>271.0</b>        | 238.4           | 311.3           | 320.6           |
|                      | <i>Low EL</i>  | <b>304.2</b>        | 271.1           | 343.5           | 355.6           |
|                      | <i>Mid EL</i>  | <b>246.0</b>        | 219.8           | 298.9           | 288.3           |
|                      | <i>High EL</i> | <b>189.9</b>        | 168.5           | 219.3           | 214.6           |
|                      | <i>Missing</i> | <b>468.5</b>        | 412.7           | 450.9           | 563.1           |
| <i>Belgian</i>       | <i>ALL EL</i>  | <b>273.3</b>        | 237.8           | 351.6           | 332.8           |
|                      | <i>Low EL</i>  | <b>314.0</b>        | 275.0           | 429.6           | 378.4           |
|                      | <i>Mid EL</i>  | <b>248.0</b>        | 219.8           | 313.2           | 300.9           |
|                      | <i>High EL</i> | <b>189.6</b>        | 167.6           | 233.3           | 214.9           |
|                      | <i>Missing</i> | <b>534.8</b>        | 439.8           | 689.9           | 641.3           |
| <i>Migrants</i>      | <i>ALL EL</i>  | <b>257.7</b>        | 251.1           | 245.5           | 268.9           |
|                      | <i>Low EL</i>  | <b>268.6</b>        | 267.5           | 250.7           | 279.3           |
|                      | <i>Mid EL</i>  | <b>230.6</b>        | 221.3           | 259.0           | 224.4           |
|                      | <i>High EL</i> | <b>194.1</b>        | 185.9           | 177.6           | 216.7           |
|                      | <i>Missing</i> | <b>339.9</b>        | 334.7           | 296.1           | 386.0           |

Note: Rates are expressed per 100,000 person-years and age standardized using the European population. Migrants are people from foreign origin officially registered as residents in Belgium.

**Appendix Table 2 Codes of deaths selected for the analysis, in ICD9 and ICD10.**

| <b>Causes of deaths</b>    | <b>ICD9</b>                                                   | <b>ICD10</b>                                                 |
|----------------------------|---------------------------------------------------------------|--------------------------------------------------------------|
| Circulatory Diseases       | 390-459                                                       | I00-I99                                                      |
| Cancers                    | 140-209                                                       | C00-C99                                                      |
| Other natural causes       | Rest(001-799)                                                 | Rest(A00-R99)                                                |
| External causes            | E800-E999                                                     | V01-Y98                                                      |
| Selected Avoidable Causes  |                                                               |                                                              |
| <i>Lip-OralCav-Phar Ca</i> | 140-149                                                       | C00-C14                                                      |
| <i>Colorectal Ca</i>       | 153:154                                                       | C18-C21                                                      |
| <i>LiverCancer</i>         | 155                                                           | C22                                                          |
| <i>Lung Ca</i>             | 162                                                           | C33-C34                                                      |
| <i>Breast Ca (women)</i>   | 174                                                           | C50                                                          |
| <i>Isc.Heart Dis.</i>      | 410:414                                                       | I20:I25                                                      |
| <i>Cer.vasc.Dis/HTA</i>    | 401:405; 430:438                                              | I10-I15; I60-I69                                             |
| <i>COPD</i>                | 490:492,494,496                                               | J40:J44, J47                                                 |
| <i>Alc. Rel Dth</i>        | 291, 303, 3050, 4255,<br>5353, 5710:5713, 5715,<br>5770, 5771 | F10, K70, K73, K74,<br>G312, G621, I426, K292,<br>K852, K860 |
| <i>Diabetes</i>            | 250                                                           | E10-E14                                                      |
| <i>Suicide</i>             | 950:959                                                       | X60-X84, Y870                                                |
| <i>Land Transport Acc.</i> | 800:829                                                       | V01:V89, Y85                                                 |

Appendix Table 3a. Age-adjusted cause-specific premature mortality rate (ASMR), by region and educational level in Males, Belgium 2000s; Belgian men aged 25-64 at census, 10 years follow up.

|                |                    | Low EL       |              |                 |                  |     |                  |     |                      | Mid EL |              |              |                 |                  |     |                  |     | High EL              |    |              |              |                 |                  |     |                  | ALL levels |                      |      |              |              |                 |                  |     |                  |     |                      |     |
|----------------|--------------------|--------------|--------------|-----------------|------------------|-----|------------------|-----|----------------------|--------|--------------|--------------|-----------------|------------------|-----|------------------|-----|----------------------|----|--------------|--------------|-----------------|------------------|-----|------------------|------------|----------------------|------|--------------|--------------|-----------------|------------------|-----|------------------|-----|----------------------|-----|
|                |                    | ASM<br>R Fla | ASM<br>R Bxl | ASM<br>R<br>Wal | RR<br>Bxl<br>-Fl | p   | RR<br>Wal<br>_Fl | p   | RR<br>Wa<br>l_B<br>x | p      | ASM<br>R Fla | ASM<br>R Bxl | ASM<br>R<br>Wal | RR<br>Bxl<br>-Fl | p   | RR<br>Wal<br>_Fl | p   | RR<br>Wa<br>l_B<br>x | p  | ASM<br>R Fla | ASM<br>R Bxl | ASM<br>R<br>Wal | RR<br>Bxl<br>-Fl | p   | RR<br>Wal<br>_Fl | p          | RR<br>Wa<br>l_B<br>x | p    | ASM<br>R Fla | ASM<br>R Bxl | ASM<br>R<br>Wal | RR<br>Bxl<br>-Fl | p   | RR<br>Wal<br>_Fl | p   | RR<br>Wa<br>l_B<br>x | p   |
| All-Cause      | ALL CAUSES         | 522.4        | 844          | 783             | 1.6              | *** | 1.5              | *** | 0.9                  | ***    | 387          | 600.8        | 582             | 1.6              | *** | 1.5              | *** | 1                    | ns | 270.4        | 379.7        | 388.3           | 1.4              | *** | 1.4              | ***        | 1                    | ns   | 433.6        | 659.4        | 665.7           | 1.5              | *** | 1.5              | *** | 1                    | ns  |
|                | Avoidable          | 368.2        | 581          | 541.4           | 1.6              | *** | 1.5              | *** | 0.9                  | **     | 265          | 407.3        | 391.4           | 1.5              | *** | 1.5              | *** | 1                    | ns | 173          | 240.1        | 251.8           | 1.4              | *** | 1.5              | ***        | 1                    | ns   | 298.2        | 440.9        | 451.8           | 1.5              | *** | 1.5              | *** | 1                    | bl  |
|                | Not Avoidable      | 154.1        | 263          | 241.5           | 1.7              | *** | 1.6              | *** | 0.9                  | *      | 122          | 193.5        | 190.7           | 1.6              | *** | 1.6              | *** | 1                    | ns | 97.4         | 139.6        | 136.4           | 1.4              | *** | 1.4              | ***        | 1                    | ns   | 135.4        | 218.5        | 213.9           | 1.6              | *** | 1.6              | *** | 1                    | ns  |
| Broad Classes  | ALL CANCERS        | 194.7        | 276          | 247.2           | 1.4              | *** | 1.3              | *** | 0.9                  | ***    | 152          | 204.6        | 186             | 1.3              | *** | 1.2              | *** | 0.9                  | bl | 115.3        | 134.8        | 137.7           | 1.2              | *** | 1.2              | ***        | 1                    | ns   | 168.6        | 216.6        | 211.2           | 1.3              | *** | 1.3              | *** | 1                    | ns  |
|                | ALL CIRCULAT. DIS. | 114.5        | 182          | 161.5           | 1.6              | *** | 1.4              | *** | 0.9                  | **     | 84           | 125.2        | 118.8           | 1.5              | *** | 1.4              | *** | 0.9                  | ns | 57.9         | 74.5         | 75.3            | 1.3              | *** | 1.3              | ***        | 1                    | ns   | 97.3         | 140          | 137.3           | 1.4              | *** | 1.4              | *** | 1                    | ns  |
|                | OTH.NAT.DEAT HS    | 119.7        | 261          | 244.2           | 2.2              | *** | 2                | *** | 0.9                  | bl     | 83.2         | 186.6        | 176.9           | 2.2              | *** | 2.1              | *** | 0.9                  | ns | 59.4         | 113.2        | 112.1           | 1.9              | *** | 1.9              | ***        | 1                    | ns   | 100          | 209.8        | 209.6           | 2.1              | *** | 2.1              | *** | 1                    | ns  |
|                | EXTERNAL CAUSES    | 93.4         | 126          | 130             | 1.3              | *** | 1.4              | *** | 1                    | ns     | 67.3         | 84.4         | 100.4           | 1.3              | **  | 1.5              | *** | 1.2                  | *  | 37.9         | 57.2         | 63.2            | 1.5              | *** | 1.7              | ***        | 1.1                  | ns   | 67.6         | 93           | 107.6           | 1.4              | *** | 1.6              | *** | 1.2                  | *** |
| Detailed       | Lung Ca            | 75.3         | 99.9         | 96.1            | 1.3              | *** | 1.3              | *** | 1                    | ns     | 50.2         | 64.8         | 62.7            | 1.3              | **  | 1.2              | *** | 1                    | ns | 30.6         | 37.8         | 37.3            | 1.2              | *   | 1.2              | ***        | 1                    | ns   | 61           | 72.9         | 77              | 1.2              | *** | 1.3              | *** | 1.1                  | ns  |
|                | Colorectal Ca      | 15.9         | 22.2         | 15.7            | 1.4              | **  | 1                | ns  | 0.7                  | **     | 15.8         | 16.6         | 14.9            | 1.1              | ns  | 0.9              | ns  | 0.9                  | ns | 12.8         | 12.5         | 13.6            | 1                | ns  | 1.1              | ns         | 1.1                  | ns   | 15.2         | 18.3         | 15.5            | 1.2              | **  | 1                | ns  | 0.9                  | *   |
|                | Lip-Or.Cav-Phar.Ca | 9.9          | 18.3         | 13.8            | 1.8              | *** | 1.4              | *** | 0.8                  | *      | 7            | 12.1         | 9.5             | 1.7              | *   | 1.4              | **  | 0.8                  | ns | 4.8          | 6.1          | 5.4             | 1.3              | ns  | 1.1              | ns         | 0.9                  | ns   | 8.4          | 13.6         | 10.7            | 1.6              | *** | 1.3              | *** | 0.8                  | **  |
|                | LiverCancer        | 4.5          | 9.4          | 8.2             | 2.1              | *** | 1.8              | *** | 0.9                  | ns     | 4.7          | 10.7         | 7.6             | 2.3              | **  | 1.6              | *** | 0.7                  | ns | 3.5          | 5.6          | 5.9             | 1.6              | bl  | 1.7              | ***        | 1.1                  | ns   | 4.4          | 8.4          | 7.6             | 1.9              | *** | 1.7              | *** | 0.9                  | ns  |
|                | Prostate Ca        | 6.3          | 5.1          | 7.8             | 0.8              | ns  | 1.2              | **  | 1.5                  | *      | 5.7          | 7.1          | 6.6             | 1.3              | ns  | 1.2              | ns  | 0.9                  | ns | 5.3          | 6.4          | 5.4             | 1.2              | ns  | 1                | ns         | 0.8                  | ns   | 6            | 6.6          | 6.9             | 1.1              | ns  | 1.1              | *   | 1.1                  | ns  |
|                | Isc.Heart Dis.     | 54.7         | 86.2         | 80.1            | 1.6              | *** | 1.5              | *** | 0.9                  | ns     | 38.6         | 57.9         | 55.2            | 1.5              | *** | 1.4              | *** | 1                    | ns | 25.8         | 35.7         | 34.7            | 1.4              | *** | 1.3              | ***        | 1                    | ns   | 45.5         | 65.9         | 65.5            | 1.4              | *** | 1.4              | *** | 1                    | ns  |
|                | Cer.vasc.Dis/HT A  | 19           | 27.1         | 28.5            | 1.4              | *** | 1.5              | *** | 1.1                  | ns     | 13.8         | 24.2         | 21.8            | 1.8              | **  | 1.6              | *** | 0.9                  | ns | 10.2         | 11.1         | 14.1            | 1.1              | ns  | 1.4              | ***        | 1.3                  | bl   | 16.5         | 22.6         | 24.7            | 1.4              | *** | 1.5              | *** | 1.1                  | ns  |
|                | C.o.p.d.           | 17.3         | 33.4         | 34.4            | 1.9              | *** | 2                | *** | 1                    | ns     | 8            | 16.6         | 14.6            | 2.1              | *** | 1.8              | *** | 0.9                  | ns | 4.5          | 7.4          | 6.7             | 1.6              | *   | 1.5              | **         | 0.9                  | ns   | 13.4         | 24.4         | 25.5            | 1.8              | *** | 1.9              | *** | 1                    | ns  |
|                | Alc. Rel Dth       | 19.5         | 55.1         | 48.3            | 2.8              | *** | 2.5              | *** | 0.9                  | bl     | 16.1         | 47.2         | 43.8            | 2.9              | *** | 2.7              | *** | 0.9                  | ns | 11.4         | 23.5         | 27.2            | 2.1              | *** | 2.4              | ***        | 1.2                  | ns   | 17.4         | 43.3         | 44.5            | 2.5              | *** | 2.6              | *** | 1                    | ns  |
|                | Diabetes           | 5.2          | 12.5         | 11.4            | 2.4              | *** | 2.2              | *** | 0.9                  | ns     | 3.4          | 5.2          | 8.9             | 1.5              | ns  | 2.6              | *** | 1.7                  | *  | 2.4          | 3.5          | 4.6             | 1.5              | ns  | 1.9              | ***        | 1.3                  | ns   | 4.3          | 8.6          | 9.6             | 2                | *** | 2.2              | *** | 1.1                  | ns  |
|                | Mental/neurol. Dis | 18.9         | 40.5         | 40.3            | 2.1              | *** | 2.1              | *** | 1                    | ns     | 13.2         | 29.9         | 29.8            | 2.3              | *** | 2.3              | *** | 1                    | ns | 9.5          | 12           | 18.3            | 1.3              | ns  | 1.9              | ***        | 1.5                  | **   | 15.6         | 28.7         | 35.3            | 1.8              | *** | 2.3              | *** | 1.2                  | *** |
|                | Ill Defined        | 10.7         | 29.2         | 24.5            | 2.7              | *** | 2.3              | *** | 0.8                  | ns     | 8.5          | 19.1         | 18.6            | 2.2              | *** | 2.2              | *** | 1                    | ns | 6.4          | 13           | 11.7            | 2                | *** | 1.8              | ***        | 0.9                  | ns   | 9.5          | 22.1         | 21.5            | 2.3              | *** | 2.3              | *** | 1                    | ns  |
|                | Suicide            | 50.4         | 69.3         | 64.1            | 1.4              | **  | 1.3              | *** | 0.9                  | ns     | 36.3         | 50.9         | 50.8            | 1.4              | **  | 1.4              | *** | 1                    | ns | 21.7         | 34.5         | 32.2            | 1.6              | *** | 1.5              | ***        | 0.9                  | ns   | 36.5         | 53.1         | 52.8            | 1.5              | *** | 1.4              | *** | 1                    | ns  |
| Transport Acc. | 22                 | 13.7         | 32.6         | 0.6             | **               | 1.5 | ***              | 2.4 | ***                  | 17     | 9.3          | 25.7         | 0.5             | ***              | 1.5 | ***              | 2.8 | ***                  | 8  | 6.6          | 15.2         | 0.8             | ns               | 1.9 | ***              | 2.3        | **                   | 15.6 | 10.7         | 26.1         | 0.7             | ***              | 1.7 | ***              | 2.4 | ***                  |     |

Note: Rates are expressed per 100,000 person-years

**Appendix Table3b. Age-adjusted cause-specific premature mortality rate (ASMR), by region and educational level in females, Belgium 2000s; Belgian women aged 25-64 at census, 10 years follow up.**

|                |                    | Low EL       |              |                 |                  |     |                  |     |                      |     | Mid EL       |              |                 |                  |     |                  |     |                  |    | High EL      |              |                 |                  |     |                  |     |                  |        | ALL levels   |              |                 |                  |     |                  |     |                      |     |
|----------------|--------------------|--------------|--------------|-----------------|------------------|-----|------------------|-----|----------------------|-----|--------------|--------------|-----------------|------------------|-----|------------------|-----|------------------|----|--------------|--------------|-----------------|------------------|-----|------------------|-----|------------------|--------|--------------|--------------|-----------------|------------------|-----|------------------|-----|----------------------|-----|
|                |                    | ASM<br>R Fla | ASM<br>R Bxl | ASM<br>R<br>Wal | RR<br>Bxl<br>-Fl | p   | RR<br>Wal<br>_Fl | p   | RR<br>Wa<br>L_B<br>x | p   | ASM<br>R Fla | ASM<br>R Bxl | ASM<br>R<br>Wal | RR<br>Bxl<br>-Fl | p   | RR<br>Wal<br>_Fl | p   | RR<br>Wal<br>_Bx | p  | ASM<br>R Fla | ASM<br>R Bxl | ASM<br>R<br>Wal | RR<br>Bxl<br>-Fl | p   | RR<br>Wa<br>L_Fl | p   | RR<br>Wal<br>_Bx | p      | ASM<br>R Fla | ASM<br>R Bxl | ASM<br>R<br>Wal | RR<br>Bxl<br>-Fl | p   | RR<br>Wal<br>_Fl | p   | RR<br>Wa<br>L_B<br>x | p   |
| All-Cause      | ALL CAUSES         | 275          | 429.6        | 378.4           | 1.6              | *** | 1.4              | *** | 0.9                  | *** | 219.8        | 313.2        | 300.9           | 1.4              | *** | 1.4              | *** | 1                | ns | 167.6        | 233.3        | 214.9           | 1.4              | *** | 1.3              | *** | 0.9              | *      | 237.8        | 351.6        | 332.8           | 1.5              | *** | 1.4              | *** | 0.9                  | *** |
|                | Avoidable          | 184.5        | 291.3        | 246.6           | 1.6              | *** | 1.3              | *** | 0.8                  | *** | 143.8        | 205.7        | 194.7           | 1.4              | *** | 1.4              | *** | 0.9              | ns | 108.1        | 156.3        | 138.3           | 1.4              | *** | 1.3              | *** | 0.9              | **     | 156.2        | 233.9        | 214.5           | 1.5              | *** | 1.4              | *** | 0.9                  | *** |
|                | Not Avoidable      | 90.5         | 138.3        | 131.8           | 1.5              | *** | 1.5              | *** | 1                    | ns  | 76           | 107.5        | 106.2           | 1.4              | *** | 1.4              | *** | 1                | ns | 59.5         | 77           | 76.6            | 1.3              | *** | 1.3              | *** | 1                | n<br>s | 81.6         | 117.7        | 118.3           | 1.4              | *** | 1.5              | *** | 1                    | ns  |
| Broad Classes  | ALL CANCERS        | 128.2        | 175.5        | 143.2           | 1.4              | *** | 1.1              | *** | 0.8                  | *** | 115.4        | 140.7        | 126.6           | 1.2              | *** | 1.1              | *** | 0.9              | *  | 97.9         | 119.2        | 104.1           | 1.2              | *** | 1.1              | *   | 0.9              | **     | 118.3        | 149.6        | 132.4           | 1.3              | *** | 1.1              | *** | 0.9                  | *** |
|                | ALL CIRCULAT. DIS. | 49.1         | 82.4         | 65.9            | 1.7              | *** | 1.3              | *** | 0.8                  | *** | 35.1         | 48.8         | 47.5            | 1.4              | *** | 1.4              | *** | 1                | ns | 18.2         | 28.6         | 26.2            | 1.6              | *** | 1.4              | *** | 0.9              | n<br>s | 40.5         | 60.1         | 55.6            | 1.5              | *** | 1.4              | *** | 0.9                  | *   |
|                | OTH.NAT.DEATHS     | 65.9         | 125.2        | 122.3           | 1.9              | *** | 1.9              | *** | 1                    | ns  | 44.9         | 86.6         | 89.1            | 1.9              | *** | 2                | *** | 1                | ns | 31.2         | 54.6         | 54.9            | 1.8              | *** | 1.8              | *** | 1                | n<br>s | 53.7         | 102.6        | 105.7           | 1.9              | *** | 2                | *** | 1                    | ns  |
|                | EXTERNAL CAUSES    | 31.8         | 46.4         | 47              | 1.5              | *** | 1.5              | *** | 1                    | ns  | 24.3         | 37.1         | 37.6            | 1.5              | **  | 1.5              | *** | 1                | ns | 20.3         | 30.9         | 29.7            | 1.5              | *** | 1.5              | *** | 1                | n<br>s | 25.2         | 39.3         | 39              | 1.6              | *** | 1.5              | *** | 1                    | ns  |
| Detailed       | Lung Ca            | 23.7         | 49.5         | 33.8            | 2.1              | *** | 1.4              | *** | 0.7                  | *** | 17.3         | 30.9         | 24              | 1.8              | *** | 1.4              | *** | 0.8              | *  | 11.2         | 21.2         | 17.9            | 1.9              | *** | 1.6              | *** | 0.8              | n<br>s | 19.3         | 35.6         | 28.4            | 1.8              | *** | 1.5              | *** | 0.8                  | *** |
|                | Colorectal Ca      | 10.4         | 12.2         | 10.4            | 1.2              | ns  | 1                | ns  | 0.8                  | ns  | 9            | 13.1         | 9.3             | 1.5              | *   | 1                | ns  | 0.7              | bl | 8.5          | 12           | 8.9             | 1.4              | *   | 1                | ns  | 0.7              | bl     | 9.7          | 11.7         | 9.9             | 1.2              | *   | 1                | ns  | 0.8                  | *   |
|                | Lip-Or.Cav-Phar.Ca | 1.8          | 3.8          | 2.6             | 2.1              | *   | 1.4              | **  | 0.7                  | ns  | 1.3          | 3.3          | 2.4             | 2.5              | *   | 1.9              | **  | 0.7              | ns | 1.3          | 0.7          | 1.5             | 0.6              | ns  | 1.2              | ns  | 2                | n<br>s | 1.6          | 2.6          | 2.5             | 1.6              | *   | 1.6              | *** | 0.9                  | ns  |
|                | LiverCancer        | 2.2          | 3            | 2.7             | 1.3              | ns  | 1.2              | ns  | 0.9                  | ns  | 1.6          | 2.2          | 2.9             | 1.4              | ns  | 1.8              | *   | 1.3              | ns | 1.3          | 2.2          | 1.1             | 1.6              | ns  | 0.8              | ns  | 0.5              | n<br>s | 2            | 2.6          | 2.4             | 1.3              | ns  | 1.2              | *   | 0.9                  | ns  |
|                | Breast Ca          | 34.3         | 38.9         | 32.1            | 1.1              | ns  | 0.9              | bl  | 0.8                  | *   | 34.4         | 34.1         | 30.2            | 1                | ns  | 0.9              | *   | 0.9              | ns | 32.6         | 36.3         | 30.2            | 1.1              | ns  | 0.9              | ns  | 0.8              | *      | 33.7         | 37.7         | 31.4            | 1.1              | *   | 0.9              | **  | 0.8                  | *** |
|                | Isc.Heart Dis.     | 15.1         | 25.4         | 22.3            | 1.7              | *** | 1.5              | *** | 0.9                  | ns  | 9.7          | 12.5         | 13.9            | 1.3              | ns  | 1.4              | *** | 1.1              | ns | 4.4          | 8.4          | 6.9             | 1.9              | **  | 1.6              | *** | 0.8              | n<br>s | 12.5         | 17.9         | 17.8            | 1.4              | *** | 1.4              | *** | 1                    | ns  |
|                | Cer.vasc.Dis/HTA   | 14.5         | 21.7         | 17.1            | 1.5              | **  | 1.2              | *   | 0.8                  | *   | 11.4         | 12.9         | 14.3            | 1.1              | ns  | 1.2              | *   | 1.1              | ns | 6.2          | 8.7          | 8.1             | 1.4              | bl  | 1.3              | *   | 0.9              | n<br>s | 11.9         | 16.2         | 15              | 1.4              | *** | 1.3              | *** | 0.9                  | ns  |
|                | C.o.p.d.           | 7.1          | 13.9         | 16.3            | 2                | *** | 2.3              | *** | 1.2                  | ns  | 4.1          | 7.6          | 9.5             | 1.8              | *   | 2.3              | *** | 1.2              | ns | 1.6          | 3.4          | 4               | 2.2              | *   | 2.6              | *** | 1.2              | n<br>s | 5.9          | 10.4         | 13              | 1.8              | *** | 2.2              | *** | 1.2                  | **  |
|                | Alc. Rel Dth       | 8            | 19.1         | 21.3            | 2.4              | *** | 2.7              | *** | 1.1                  | ns  | 7.6          | 17           | 17.6            | 2.3              | *** | 2.3              | *** | 1                | ns | 5.6          | 8.7          | 10.7            | 1.6              | *   | 1.9              | *** | 1.2              | n<br>s | 7.4          | 16.5         | 18.1            | 2.2              | *** | 2.5              | *** | 1.1                  | ns  |
|                | Diabetes           | 2.9          | 6.3          | 5.1             | 2.2              | **  | 1.8              | *** | 0.8                  | ns  | 1.6          | 2.2          | 3               | 1.4              | ns  | 1.9              | **  | 1.4              | ns | 0.8          | 3.1          | 2.2             | 3.9              | *   | 2.9              | *** | 0.7              | n<br>s | 2.2          | 4.5          | 4.3             | 2.1              | *** | 2                | *** | 1                    | ns  |
|                | Mental/neurol. Dis | 12.9         | 14.9         | 20.9            | 1.2              | ns  | 1.6              | *** | 1.4                  | **  | 9.6          | 13.2         | 15.2            | 1.4              | bl  | 1.6              | *** | 1.2              | ns | 7.8          | 7.4          | 10.4            | 0.9              | ns  | 1.3              | **  | 1.4              | *      | 10.7         | 14.5         | 18.1            | 1.4              | *** | 1.7              | *** | 1.2                  | **  |
|                | Ill Defined        | 4.2          | 10.3         | 10              | 2.5              | *** | 2.4              | *** | 1                    | ns  | 3.1          | 8            | 7.9             | 2.5              | **  | 2.5              | *** | 1                | ns | 3.4          | 5.8          | 5.2             | 1.7              | *   | 1.5              | **  | 0.9              | n<br>s | 3.9          | 9            | 9.3             | 2.3              | *** | 2.4              | *** | 1                    | ns  |
|                | Suicide            | 17           | 24.8         | 21              | 1.5              | *   | 1.2              | *   | 0.8                  | ns  | 14.1         | 24           | 17.5            | 1.7              | **  | 1.2              | **  | 0.7              | bl | 12.6         | 20.5         | 16.1            | 1.6              | *** | 1.3              | *** | 0.8              | **     | 14.2         | 23.6         | 18.3            | 1.7              | *** | 1.3              | *** | 0.8                  | *** |
| Transport Acc. | 6.4                | 5.5          | 11.1         | 0.9             | ns               | 1.7 | **               | 2   | **                   | 3.9 | 1.2          | 7.5          | 0.3             | ***              | 1.9 | ***              | 6.4 | **               | 3  | 2.6          | 5.4          | 0.9             | ns               | 1.8 | ***              | 2   | **               | 4.2    | 2.7          | 7.7          | 0.7             | *                | 1.8 | ***              | 2.8 | ***                  |     |

Note: Rates are expressed per 100,000 person-years
